# Supplementary material for: APOSCREEN-1 – a prospective, single-arm clinical trial for the implementation of a pharmacy-based screening for cardiovascular-kidney-metabolic risk factors in Schleswig-Holstein
Source: BMC Nephrol. 2026 Jun 5;27:357. doi: 10.1186/s12882-026-05090-x (PMC13244955; doi:10.1186/s12882-026-05090-x)
Supplement: Supplementary file 4 — Supplementary Material 4 [file 12882_2026_5090_MOESM4_ESM.xlsx]

## Sheet: English
Drug	Mechanism / class	Therapeutic group
Captopril	ACE inhibitor	Antihypertensives
Enalapril	ACE inhibitor	Antihypertensives
Lisinopril	ACE inhibitor	Antihypertensives
Ramipril	ACE inhibitor	Antihypertensives
Perindopril	ACE inhibitor	Antihypertensives
Quinapril	ACE inhibitor	Antihypertensives
Benazepril	ACE inhibitor	Antihypertensives
Fosinopril	ACE inhibitor	Antihypertensives
Trandolapril	ACE inhibitor	Antihypertensives
Sacubitril / Valsartan	Angiotensin receptor-neprilysin inhibitor	Antihypertensives
Losartan	AT1 receptor blocker (ARB)	Antihypertensives
Valsartan	AT1 receptor blocker (ARB)	Antihypertensives
Candesartan	AT1 receptor blocker (ARB)	Antihypertensives
Irbesartan	AT1 receptor blocker (ARB)	Antihypertensives
Telmisartan	AT1 receptor blocker (ARB)	Antihypertensives
Olmesartan	AT1 receptor blocker (ARB)	Antihypertensives
Eprosartan	AT1 receptor blocker (ARB)	Antihypertensives							s
Azilsartan	AT1 receptor blocker (ARB)	Antihypertensives
Amlodipine	Dihydropyridine calcium antagonist	Antihypertensives
Nifedipine	Dihydropyridine calcium antagonist	Antihypertensives
Lercanidipine	Dihydropyridine calcium antagonist	Antihypertensives
Felodipine	Dihydropyridine calcium antagonist	Antihypertensives
Nitrendipine	Dihydropyridine calcium antagonist	Antihypertensives
Barnidipine	Dihydropyridine calcium antagonist	Antihypertensives
Lacidipine	Dihydropyridine calcium antagonist	Antihypertensives
Verapamil	Non-DHP calcium antagonist	Antihypertensives
Diltiazem	Non-DHP calcium antagonist	Antihypertensives
Bisoprolol	β1-selective beta blocker	Antihypertensives
Metoprolol	β1-selective beta blocker	Antihypertensives
Nebivolol	β1-selective beta blocker	Antihypertensives
Atenolol	β1-selective beta blocker	Antihypertensives
Carvedilol	Non-selective beta blocker + α1 block	Antihypertensives
Propranolol	Non-selective beta blocker	Antihypertensives
Betaxolol	β1-selective beta blocker	Antihypertensives
Acebutolol	β1-blocker partial agonist	Antihypertensives
Sotalol	Non-selective β-blocker + class III antiarrhythmic	Antihypertensives
Hydrochlorothiazide	Thiazide diuretic	Antihypertensives
Indapamide	Thiazide-like diuretic	Antihypertensives
Chlorthalidone	Thiazide-like diuretic	Antihypertensives
Xipamide	Thiazide-like diuretic	Antihypertensives
Furosemide	Loop diuretic	Antihypertensives
Torasemide	Loop diuretic	Antihypertensives
Piretanide	Loop diuretic	Antihypertensives
Spironolactone	Aldosterone antagonist	Antihypertensives
Eplerenone	Aldosterone antagonist	Antihypertensives
Amiloride	ENaC inhibitor	Antihypertensives
Triamterene	ENaC inhibitor	Antihypertensives
Clonidine	Central α2 agonist	Antihypertensives
Moxonidine	Imidazoline agonist	Antihypertensives
Methyldopa	Central α2 agonist prodrug	Antihypertensives
Urapidil	α1 antagonist + 5HT1A agonist	Antihypertensives
Doxazosin	α1 blocker	Antihypertensives
Prazosin	α1 blocker	Antihypertensives
Hydralazine	Direct vasodilator	Antihypertensives
Minoxidil	K-channel opener vasodilator	Antihypertensives
Aliskiren	Direct renin inhibitor	Antihypertensives
Atorvastatin	HMG-CoA reductase inhibitor	Lipid management
Rosuvastatin	HMG-CoA reductase inhibitor	Lipid management
Simvastatin	HMG-CoA reductase inhibitor	Lipid management
Pravastatin	HMG-CoA reductase inhibitor	Lipid management
Fluvastatin	HMG-CoA reductase inhibitor	Lipid management
Lovastatin	HMG-CoA reductase inhibitor	Lipid management
Ezetimibe	Cholesterol absorption inhibitor	Lipid management
Cholestyramine	Bile acid sequestrant	Lipid management
Colesevelam	Bile acid sequestrant	Lipid management
Evolocumab	PCSK9 antibody	Lipid management
Alirocumab	PCSK9 antibody	Lipid management
Inclisiran	siRNA against PCSK9	Lipid management
Fenofibrate	Fibrate	Lipid management
Bezafibrate	Fibrate	Lipid management
Gemfibrozil	Fibrate	Lipid management
Niacin	Antilipidemic	Lipid management
Omega-3 fatty acids	Triglyceride lowering	Lipid management
Lomitapide	MTP inhibitor	Lipid management
Mipomersen	Antisense ApoB	Lipid management
Bempedoic acid	ACL inhibitor	Lipid management
Regular human insulin	short-acting insulin	Insulins
Insulin lispro	rapid-acting analogue	Insulins
Insulin aspart	rapid-acting analogue	Insulins
Insulin glulisine	rapid-acting analogue	Insulins
NPH insulin	intermediate-acting insulin	Insulins
Insulin glargine	long-acting insulin	Insulins
Insulin detemir	long-acting insulin	Insulins
Insulin degludec	ultra-long acting insulin	Insulins
Repaglinide	Meglitinide	Antidiabetics
Nateglinide	Meglitinide	Antidiabetics
Metformin	Biguanide	Antidiabetics
Glibenclamide	Sulfonylurea	Antidiabetics
Glimepiride	Sulfonylurea	Antidiabetics
Gliclazide	Sulfonylurea	Antidiabetics
Gliquidone	Sulfonylurea	Antidiabetics
Sitagliptin	DPP-4 inhibitor	Antidiabetics
Vildagliptin	DPP-4 inhibitor	Antidiabetics
Saxagliptin	DPP-4 inhibitor	Antidiabetics
Linagliptin	DPP-4 inhibitor	Antidiabetics
Alogliptin	DPP-4 inhibitor	Antidiabetics
Exenatide	GLP-1 receptor agonist	Antidiabetics
Liraglutide	GLP-1 receptor agonist	Antidiabetics
Dulaglutide	GLP-1 receptor agonist	Antidiabetics
Semaglutide s.c.	GLP-1 receptor agonist	Antidiabetics
Semaglutide oral	GLP-1 receptor agonist oral	Antidiabetics
Tirzepatide	Dual GLP-1 + GIP agonist	Antidiabetics
Empagliflozin	SGLT-2 inhibitor	Antidiabetics
Dapagliflozin	SGLT-2 inhibitor	Antidiabetics
Canagliflozin	SGLT-2 inhibitor	Antidiabetics
Ertugliflozin	SGLT-2 inhibitor	Antidiabetics
Pioglitazone	PPAR-γ agonist	Antidiabetics
Acarbose	Alpha-glucosidase inhibitor	Antidiabetics
